# Supplementary material
Source: PubMed Central journal article supplement (PMC11009504)
Supplement: djad085_supplementary_data.pdf [file djad085_supplementary_data.pdf]

**Supplementary Materials for Chi, SN et al. Tazemetostat for Tumors Harboring SMARCB1/SMARCA4 or EZH2 Alterations:**

**Results from NCI-COG Pediatric MATCH APEC1621C**

**Supplementary Table 1. Designated actionable tumor alterations for Pediatric MATCH Arm C.**

| <b>Gene Name</b>                                           | <b>Variant ID</b> | <b>Variant Type</b> | <b>Actionable mutation</b>                                      |
|------------------------------------------------------------|-------------------|---------------------|-----------------------------------------------------------------|
| SMARCB1                                                    | N/A               | N/A                 | Two deleterious (inactivating) mutations or protein loss by IHC |
| SMARCA4                                                    | N/A               | N/A                 | Two deleterious (inactivating) mutations or protein loss by IHC |
| EZH2                                                       | COSM37032         | SNV                 | p.Y646C                                                         |
| EZH2                                                       | COSM37028         | SNV                 | p.Y646F                                                         |
| EZH2                                                       | COSM37030         | SNV                 | p.Y646H                                                         |
| EZH2                                                       | COSM37031         | SNV                 | p.Y646N                                                         |
| EZH2                                                       | COSM37029         | SNV                 | p.Y646S                                                         |
| EZH2                                                       | COSM220386        | SNV                 | p.A682G                                                         |
| EZH2                                                       | COSM1315851       | SNV                 | p.A682V                                                         |
| EZH2                                                       | COSM220529        | SNV                 | p.A692V                                                         |
| IHC, immunohistochemistry; SNV, single nucleotide variant. |                   |                     |                                                                 |

**Supplementary Table 2. Prior Therapy of Patients Treated on APEC1621C.**

| <b>Patient ID</b> | <b>Diagnosis</b>         | <b>Multi-Agent<br/>Chemotherapy</b> | <b>Autologous Stem<br/>Cell Transplant</b> | <b>Radiation<br/>Therapy</b> | <b>Other*</b> |
|-------------------|--------------------------|-------------------------------------|--------------------------------------------|------------------------------|---------------|
| 1                 | Ewing Sarcoma            | X                                   | --                                         | X                            | --            |
| 2                 | Hepatocellular carcinoma | X                                   | --                                         | X                            | X             |
| 3                 | Non-LCH                  | X                                   | --                                         | --                           | X             |
| 4                 | ES                       | X                                   | --                                         | X                            | --            |
| 5                 | ATRT                     | X                                   | X                                          | --                           | --            |
| 6                 | RMC                      | X                                   | --                                         | --                           | --            |
| 7                 | ES                       | X                                   | --                                         | --                           | --            |
| 8                 | ATRT                     | X                                   | X                                          | X                            | X             |
| 9                 | ATRT                     | X                                   | X                                          | X                            | X             |
| 10                | Ependymoma               | X                                   | --                                         | X                            | X             |
| 11                | ATRT                     | X                                   | --                                         | X                            | --            |
| 12                | MRT                      | X                                   | --                                         | --                           | --            |
| 13                | ATRT                     | X                                   | --                                         | X                            | --            |
| 14                | ATRT                     | X                                   | X                                          | X                            | X             |
| 15                | ATRT                     | X                                   | --                                         | X                            | --            |
| 16                | ATRT                     | X                                   | X                                          | X                            | X             |
| 17                | MRT                      | X                                   | --                                         | X                            | --            |
| 18                | Ewing sarcoma            | X                                   | --                                         | --                           | --            |
| 19                | MRT                      | X                                   | --                                         | --                           | --            |
| 20                | MRT                      | X                                   | --                                         | --                           | --            |

\*Other: including experimental, maintenance, or immune therapies. ATRT, atypical teratoid rhabdoid tumor; RMC, renal medullary carcinoma; ES, epithelioid sarcoma; LCH, Langerhans cell histiocytosis.

**Supplementary Table 3. Diagnoses and detailed genomic test results of 20 treated patients.**

| Patient ID | Age (yrs) | Sex    | Diagnosis                | Actionable tumor mutation(s)                       | Other tumor cancer gene mutations detected        | Germline mutation detected   |
|------------|-----------|--------|--------------------------|----------------------------------------------------|---------------------------------------------------|------------------------------|
| 5          | 1         | Male   | ATRT                     | SMARCB1 loss by IHC                                | --                                                | --                           |
| 15         | 3         | Female | ATRT                     | SMARCB1 loss by IHC                                | --                                                | --                           |
| 14         | 3         | Female | ATRT                     | SMARCB1 loss by IHC;<br>SMARCB1 p.Tyr47Ter (0.94)  | TP53 c.796G>A,<br>p.Gly266Arg (0.155)             | SMARCB1<br>p.Tyr47Ter (0.52) |
| 11         | 3         | Female | ATRT                     | SMARCB1 loss by IHC;<br>SMARCB1 p.Arg201Ter (0.79) | TSC1 p.Gln897fs (0.50)                            | --                           |
| 8          | 4         | Male   | ATRT                     | SMARCB1 loss by IHC                                | NRAS p.Gln61Arg (0.33);<br>TP53 p.Leu130fs (0.49) | --                           |
| 13         | 5         | Male   | ATRT                     | SMARCB1 loss by IHC                                | --                                                | --                           |
| 16         | 5         | Male   | ATRT                     | SMARCB1 loss by IHC                                | --                                                | --                           |
| 9          | 20        | Female | ATRT                     | SMARCB1 loss by IHC                                | --                                                | --                           |
| 17         | 1         | Female | MRT                      | SMARCB1 loss by IHC;<br>SMARCB1 p.Arg201Ter (0.65) | --                                                | --                           |
| 12         | 2         | Male   | MRT                      | SMARCB1 loss by IHC                                | --                                                | --                           |
| 20         | 3         | Female | MRT                      | SMARCB1 loss by IHC                                | --                                                | --                           |
| 19         | 3         | Male   | MRT                      | SMARCB1 loss by IHC                                | --                                                | --                           |
| 7          | 15        | Male   | ES                       | SMARCB1 loss by IHC                                | --                                                | --                           |
| 4          | 18        | Male   | ES                       | SMARCB1 loss by IHC                                | --                                                | --                           |
| 6          | 19        | Male   | RMC                      | SMARCB1 loss by IHC                                | --                                                | --                           |
| 2          | 10        | Male   | Hepatocellular carcinoma | SMARCB1 loss by IHC                                | CHEK2 p.Thr367fs (0.52);<br>DNAJB1-PRKACA fusion  | CHEK2 p.Thr367fs (0.49)      |
| 3          | 10        | Male   | Non-LCH                  | SMARCA4 loss by IHC                                | --                                                | --                           |
| 18         | 17        | Female | Ewing sarcoma            | EZH2 p.Ala682Gly (0.12)                            | --                                                | --                           |
| 1          | 17        | Male   | Ewing sarcoma            | EZH2 p.Tyr646Phe (0.14)                            | --                                                | --                           |
| 10         | 15        | Male   | Ependymoma               | EZH2 p.Ala692Val (0.52)                            | --                                                | --                           |

NOTE: Age as reported at screening protocol study enrollment. Variant allele fractions (VAFs) for mutations are provided in parentheses. IHC, immunohistochemistry; fs, frameshift. ATRT, atypical teratoid rhabdoid tumor; RMC, renal medullary carcinoma; ES, epithelioid sarcoma; LCH, Langerhans cell histiocytosis.

**Supplementary Table 4. All Grade 3 or above adverse events potentially associated with the protocol treatment (with attribution Possible, Probable, or Definite) as per CTCAE v5.0.**

| <b>Patient ID</b> | <b>Dose Level (mg/m<sup>2</sup>)</b> | <b>Reporting period</b>   | <b>Adverse event</b>               | <b>Grade</b> | <b>Attribution</b> |
|-------------------|--------------------------------------|---------------------------|------------------------------------|--------------|--------------------|
| 2                 | 1200                                 | Follow-Up Period (30-day) | Alkaline phosphatase increased     | 3            | Possible           |
| 9                 | 1200                                 | Cycle 1                   | Dyspnea                            | 3            | Possible           |
| 9                 | 1200                                 | Cycle 1                   | Alanine aminotransferase increased | 3            | Probable           |
| 9                 | 1200                                 | Cycle 1                   | Abdominal pain                     | 3            | Probable           |
| 9                 | 1200                                 | Cycle 1                   | Platelet count decreased           | 3            | Probable           |
| 9                 | 1200                                 | Follow-Up Period (30-day) | GGT increased                      | 3            | Possible           |
| 11                | 1200                                 | Cycle 5                   | Anemia                             | 3            | Possible           |
| 16                | 1200                                 | Cycle 1                   | Intracranial hemorrhage            | 3            | Possible           |
| 17                | 520                                  | Cycle 1                   | Lung infection                     | 3            | Possible           |
| 19                | 520                                  | Cycle 1                   | Anemia                             | 3            | Probable           |

# Supplementary Figure 1

**A Matched Patients (n=32)**

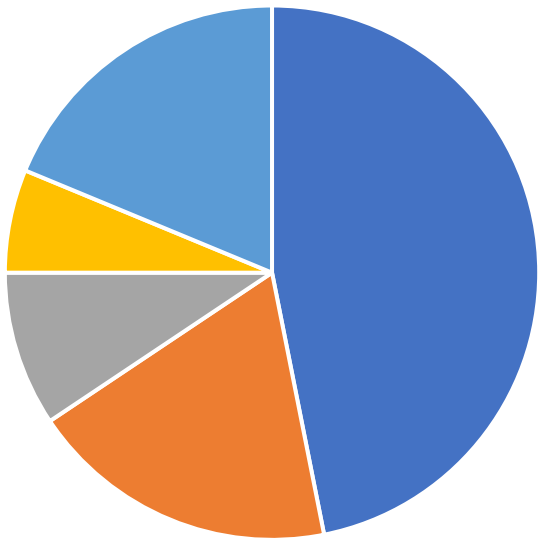

■ ATRT ■ MRT ■ EWS ■ ES ■ Other

**B Treated Patients (n=20)**

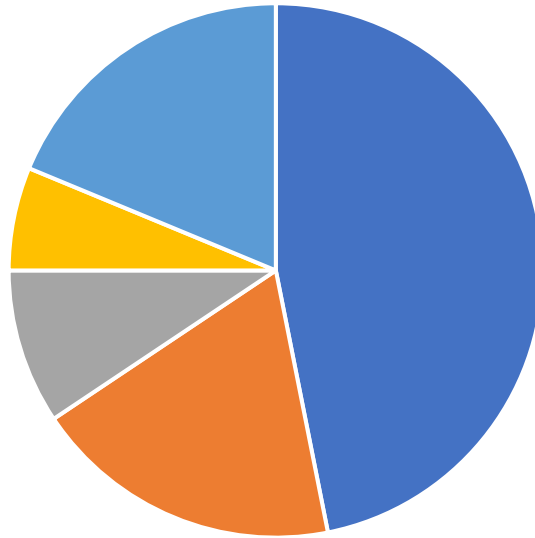

■ ATRT ■ MRT ■ EWS ■ ES ■ Other

**C Matched Patients (n=32)**

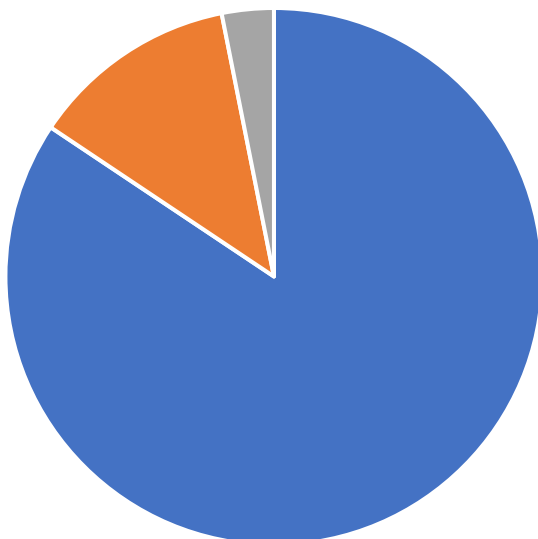

■ SMARCB1 loss ■ EZH2 mutation  
■ SMARCA4 loss

**D Treated Patients (n=20)**

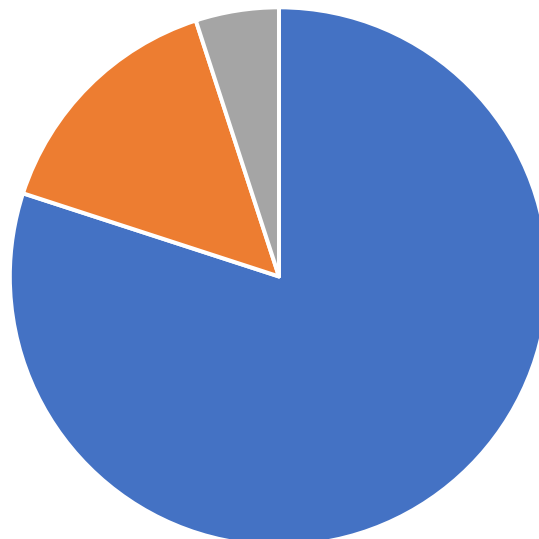

■ SMARCB1 loss ■ EZH2 mutation  
■ SMARCA4 loss

**Supplementary Figure 1.** Histologic diagnoses and distribution of actionable alterations of all 32 matched patients (A, C) and 20 treated patients (B, D) on arm C.
